# Supplementary material for: Qingpeng Ointment Ameliorates Inflammatory Responses and Dysregulation of Itch-Related Molecules for Its Antipruritic Effects in Experimental Allergic Contact Dermatitis
Source: Front Pharmacol. 2019 Apr 9;10:354. doi: 10.3389/fphar.2019.00354 (PMC6465648; doi:10.3389/fphar.2019.00354)
Supplement: TABLE S1 — The key targets of chronic dermatitis or QP (Sheet 1), and targets corresponding to key signaling pathways (Sheet 2) based on the platform of BATMAN-TCM. [file Table_1.xlsx]

## Sheet: Sheet1
The key targets of chronic dermatitis
Target	Target	Target
TNF	IL-4	PSMB8
IL-2RG	IL-23R	CASR
IL-2RA	PRKACA	STAT3
APOA1	CD3G	STAT1
GNA11	B2M	IKBKG
FGA	TLR4	NFKB1
PIK3CA	PIK3R1	ESR1
IL-6	NR3C1	KIT
EGFR	IL-10
The key targets of QP
Target	Target	Target	Target
LPAR5	MT-CO2	IL-8	TAC1
IL-5	TNF	IL-4	HDAC2
NK-κB1	PIK3CA	PIK3R1	NOS3
ESR1	IL-6	NR3C1	ITGB3
KIT	EGFR	IL-10	F2
PPP2CB	JUN	BCL2	FASLG
MED1	ANXA1	OPRM1	INS
ITGB2	AVP	ACTN2	AGTR1
AVPR2	IKBKB	NCOR1	ALB
MTOR	SRC	CFTR	PIK3CB
CHUK	ITPR1	GNRH1	CREB1
PDGFB	ITPR2	AR	RXRA
ATF2	EDNRA	EDN1	AGT
CTNNB1	CAMK2G	NMUR2	ITGAV
CCL5	AURKA	IGF2	PRKCB
GNAT3	HSP90AA1	ALDOA	PTGS2
MEF2C	RXRG	PML	PPP2CA
SP1	SERPINE1	PF4	PRKCD
BDKRB2	STAT5A	JAK3	HCK
CHRM2	CNR1	IL-2	PLCB1
FOS	CXCR4	CSF2	GNB2L1
PROS1	ADRB2	C3	GNAS
ADRBK1	PPARG	NFKBIA	ADCY3
PPARA	YWHAE	NGFR	HDAC1
NGF	NOS2	AKT1	PRKCG
PIK3CD	CHRM1	ITPR3	DLG4
IL-17A	LEP	WNT5A	ALAS1
RHOA	PRKCA	ADIPOQ	NOTCH1
PCNA	IFNG	MMP2	HIF1A
PLG	SIRT1	MAPK9	NCOA1
NFATC1	TP53	CDC42	PKM
IGF1	ADCY1	PPP2R1A	PLCG2
IL-1β	TGFB1

## Sheet: Sheet2
Targets corresponding to key signaling pathways
Signaling pathway	target
PI3K-Akt signaling pathway	PDGFB, FASLG, NFKB1, TLR4, ITGB3, KIT, ATF2, AKT1, INS, PPP2CA, BCL2, ITGAV, PPP2CB, PIK3CA, IL-2RG, NOS3, CHUK, PIK3R1, PRKCA, IL-4, EGFR, PPP2R1A, IL-6, HSP90AA1, IL-2RA, PIK3CB, CREB1, RXRA, PIK3CD, TP53, IGF1, YWHAE, LPAR5, CHRM2, CHRM1, IKBKG, JAK3, NGFR, MTOR, IKBKB, NGF, IL-2
T cell receptor signaling pathway	IL-4, CSF2, TNF, IL-5, CD3G, PIK3CB, PIK3CD, NFKBIA, NFKB1, IL-10, AKT1, CDC42, FOS, JUN, IKBKG, IFNG, RHOA, PIK3CA, IKBKB, CHUK, PIK3R1, IL-2, NFATC1
TNF signaling pathway	CSF2, IL-6, TNF, PTGS2, PIK3CB, CREB1, EDN1, PIK3CD, NFKBIA, NFKB1, CCL5, ATF2, AKT1, FOS, JUN, IKBKG, MAPK9, IL-1β, PIK3CA, IKBKB, CHUK, PIK3R1
Jak-STAT signaling pathway	IL-4, CSF2, IL-6, IL23R, IL2RA, IL-5, PIK3CB, STAT5A, PIK3CD, STAT1, IL10, STAT3, LEP, AKT1, IFNG, PIK3CA, IL-2RG, JAK3, PIK3R1, IL-2
MAPK signaling pathway	PRKCA, MEF2C, EGFR, TNF, PDGFB, TP53, FASLG, NFKB1, PRKCG, TGFB1, PRKCB, ATF2, AKT1, CDC42, FOS, JUN, IKBKG, MAPK9, IL-1β, PRKACA, IKBKB, CHUK, NFATC1, NGF
NF-κB signaling pathway	TNF, PTGS2, BCL2, PLCG2, IKBKG, NFKBIA, IL-1β, NFKB1, TLR4, IKBKB, CHUK
